# Supplementary material for: A novel approach to identify molecular binding to the influenza virus H5N1: screening using molecularly imprinted polymers (MIPs)
Source: Royal Society of Chemistry journal article supplement (doi:10.1039/c3md00272a), 2014-01-01
Supplement: c3md00272a1.pdf [file c3md00272a1.pdf]

## Supporting Information

### A Novel Approach to Identify Molecular Binding to Influenza Virus N5N1: Screening using Molecularly Imprinted Polymers (MIPs)

Thipvaree Wangchareansak, Arunee Thitithanyanont, Daungmanee Chuakheaw, M. Paul Gleeson, Peter A. Lieberzeit and Chak Sangma

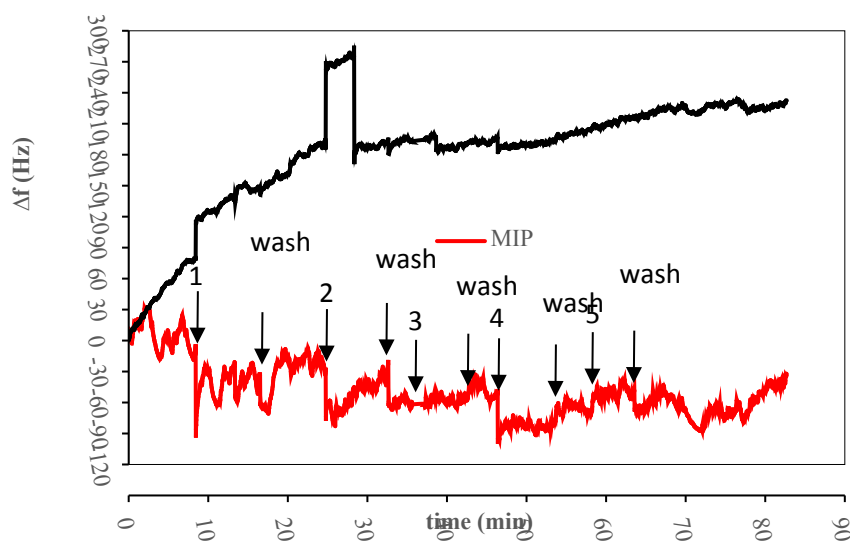

**Figure S1.** H5N1 MIP QCM frequency changes using the MIP (red), NIP (black) with different type of free probes including GlcNAc (1), Anti H5 (2), Oseltarmivir (3), Sialic acid (4) and Anti H1 (5).
